# Supplementary material for: The complete mitochondrial genome of Gyps coprotheres (Aves, Accipitridae, Accipitriformes): phylogenetic analysis of mitogenome among raptors
Source: PeerJ journal article supplement (doi:10.7717/peerj.10034), 2020-11-11

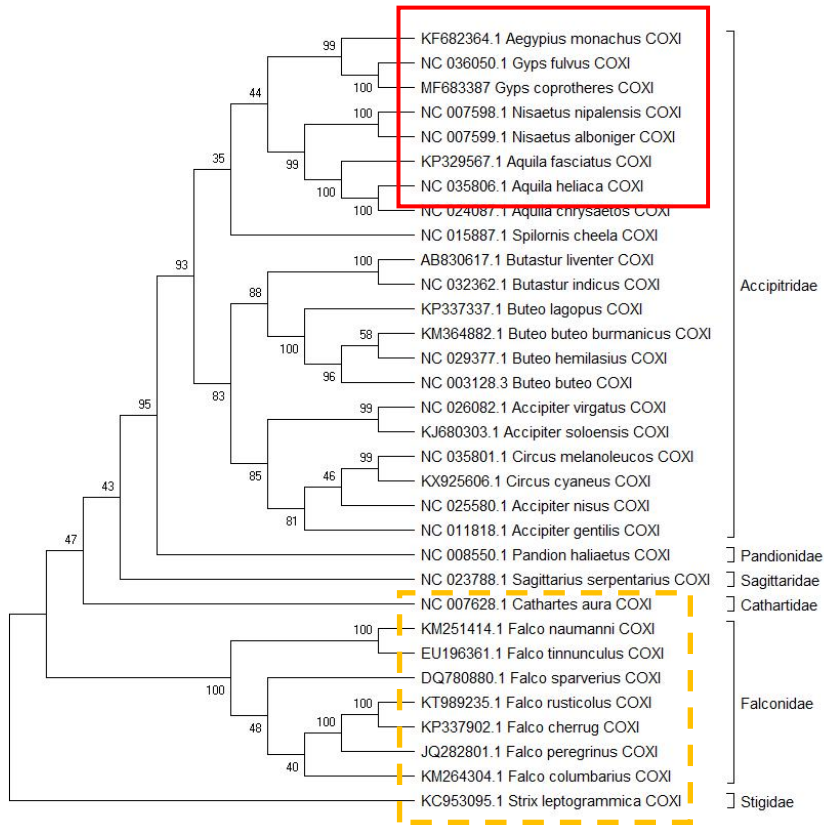

Supplement: Supplementary_1.pdf [file Supplementary_1.pdf]
